# Supplementary material for: The interaction network of the YidC insertase with the SecYEG translocon, SRP and the SRP receptor FtsY
Source: PubMed Central journal article supplement (PMC5766551; doi:10.1038/s41598-017-19019-w), 2018-01-12

## **Supplementary information to**

### **The interaction network of the YidC insertase with the SecYEG translocon, SRP and the SRP receptor FtsY**

Narcis-Adrian Petriman<sup>1,2</sup>, Benjamin Jauß<sup>1</sup>, Antonia Hufnagel<sup>1</sup>, Lisa Franz<sup>1</sup>, Ilie Sachelaru<sup>1,2</sup>, Friedel Drepper<sup>3,4</sup>, Bettina Warscheid<sup>3,4</sup> and Hans-Georg Koch<sup>1,\*</sup>

<sup>1</sup>Institute of Biochemistry and Molecular Biology, ZBMZ, Faculty of Medicine, Albert-Ludwigs-University Freiburg, 79104 Freiburg Germany, <sup>2</sup>Faculty of Biology, Albert-Ludwigs-University Freiburg, 79104 Freiburg, Germany, <sup>3</sup>Institute of Biology II, Biochemistry – Functional Proteomics, Faculty of Biology, Albert-Ludwigs-University Freiburg, 79104 Freiburg, Germany, <sup>4</sup>BIOSS Centre for Biological Signalling Studies, Albert-Ludwigs-University Freiburg, 79104 Freiburg, Germany

Running title: YidC-SecYEG interaction

\*Correspondence should be addressed to: Hans-Georg Koch, Institute of Biochemistry and Molecular Biology, ZBMZ, Faculty of Medicine, Albert-Ludwigs-University Freiburg, Stefan-Meier Strasse 17; 79104 Freiburg, Germany, Telephone 0049-761-2035250; Fax: 0049-761-203-5289; E-mail: Hans-Georg.Koch@biochemie.uni-freiburg.de

## Supplementary Figure legends

**Supplementary Figure S1: YidC makes multiple contacts to SecY.** The *in vivo* photo-cross-linking material produced for figure **2a, 2b and 2c** was analysed on western blot with  $\alpha$ -SecY antibodies. Similarly the material produced for figure **2d** was analysed with  $\alpha$ -SecY antibodies. Indicated are the UV dependent 95kDa YidC-SecY cross-links as revealed by antibodies directed against SecY (**a-d**). The material was purified via a His-tag on SecY before immune detection. 2xSecY probably corresponds to a SecY dimer that is not dissociated due to the denaturation at 37 °C. Note, that due to the weak signal in (**a, c & d**), a long exposure time was required.

**Supplementary Figure S2: YidC makes multiple contacts to SecE and SecG.** *In vivo* photo-cross-linking was performed with the co-expression system using YidC variants which contained pBpa at the indicated positions. Cross-linked material was subsequently purified via the His-tag on SecY. The analysis of the purified material on western blot with SecE antibodies (**a and b**) or SecG antibodies (**c**) revealed YidC-SecE and YidC-SecG cross-links migrating at about 65kDa. \* indicates a possible proteolysis product of the YidC-SecG cross-link.

**Supplementary Figure S3: TM1 is not required for the interaction with SecY.** (**a**) Expression test for the  $\Delta$ 2-23YidC variant.  $1 \times 10^8$  cells were collected before (-) and after (+) addition of IPTG, precipitated with 5% trichloroacetic acid (TCA) and after western transfer decorated with  $\alpha$ -YidC (upper panel) and  $\alpha$ -His antibodies (lower panel). (**b**) A pelB-YidC construct in which TM1 was replaced by the cleavable PelB signal sequence was tested in the co-expression system for its complementation of the conditional *yidC* deletion strain JS7131 as described in the legend to Figure 5. As a control the plasmid-free JS7131 strain (empty) and a JS7131 strain just expressing SecYEG were tested.

**Supplementary Figure S4: Uncropped images of all western blots and LB plates used in this study.** Labelling of the panels corresponds to the figure labeling in the manuscript and the supplementary information. The numbers in the right margin of each panel corresponds to the molecular weight marker.

**Supplementary Table S1: Oligonucleotides used in this study**

| Primer's name      | Sequence (5' to 3')                        | Template DNA                                                                   | Purpose of use                                                  |
|--------------------|--------------------------------------------|--------------------------------------------------------------------------------|-----------------------------------------------------------------|
| For_YidC_NcoI      | cggaccatttgataccatggagaacactaacgatgg       | <i>E. coli</i> MC4100 genomic DNA                                              | Amplification of NcoI_YidC_XbaI DNA fragment                    |
| Rev_YidC_XbaI      | gaaaaaaggcgggtcaatctagaccgccattattttagcg   |                                                                                |                                                                 |
| For_10XH_YidC_pBad | atcaccatcacggcagcggagattcgcaacgcaatcttttag | pBad24-YidC                                                                    | (his) <sub>10</sub> -gly-ser-gly- pBad24-YidC                   |
| Rev_10XH_YidC_pBad | ggtgatggtgatggtgatgcatcgtagtgttctccatgg    | pBad24-YidC                                                                    | (his) <sub>10</sub> -gly-ser-gly- pBad24-YidC                   |
| D399_YidC_for      | cgctctgggctaggacaacacagcg                  | YidC gene                                                                      | D399pBpa YidC                                                   |
| R396_YidC_rev      | ctcacgcattgcctgaatcttcg                    | YidC gene                                                                      |                                                                 |
| D236pBpa_for       | tagaccattgccgataacg                        | YidC gene                                                                      | D236pBpa YidC                                                   |
| D236pBpa_rev       | gaacttgatttctcatac                         | YidC gene                                                                      |                                                                 |
| F14pBpa_for        | taggtgtcttcatgatctg                        | YidC gene                                                                      | F14pBpa YidC                                                    |
| F14pBpa_rev        | cagcaaagcgatgactaaaag                      | YidC gene                                                                      |                                                                 |
| V15pBpa_for        | tagtcttcatgatctggc                         | YidC gene                                                                      | V15pBpa YidC                                                    |
| V15pBpa_rev        | gaacagcaaagcgatgact                        | YidC gene                                                                      |                                                                 |
| L326pBpa_for       | tagaccgttgattacgggttg                      | YidC gene                                                                      | L326pBpa YidC                                                   |
| L326pBpa_rev       | atccaggtgaggcaac                           | YidC gene                                                                      |                                                                 |
| F335_YidC_for      | tagatctctcagccgctgttcaaac                  | YidC gene                                                                      | F335pBpa YidC                                                   |
| F335_YidC_rev      | ccaaaaccaaccgtaatacaacggtc                 | YidC gene                                                                      |                                                                 |
| F350_YidC_for      | taggtgggtaactgggctctctcc                   | YidC gene                                                                      | F350pBpa YidC                                                   |
| F350_YidC_rev      | gctatggatccatttcagcagtttg                  | YidC gene                                                                      |                                                                 |
| YidC_P431pBpa_for  | tagatcttctggcgtgtgac                       | YidC gene                                                                      | P431pBpa YidC                                                   |
| YidC_P431pBpa_rev  | catctggatcagcagcggg                        | YidC gene                                                                      |                                                                 |
| V473_YidC_for      | atcctgatgggctagacgatgttc                   | YidC gene                                                                      | V473pBpa YidC                                                   |
| V500_YidC_rev      | cggcataaaggatcatgatcttctg                  | YidC gene                                                                      |                                                                 |
| V500_YidC_for      | tagatcttcaccgtgttctctg                     | YidC gene                                                                      | V500pBpa YidC                                                   |
| V500_YidC_rev      | cggcataaaggatcatgatcttctg                  | YidC gene                                                                      |                                                                 |
| V504_YidC_for      | gtcatcttcacctagtcttctctg                   | YidC gene                                                                      | V504pBpa YidC                                                   |
| V500_YidC_rev      | cggcataaaggatcatgatcttctg                  | YidC gene                                                                      |                                                                 |
| F505YidC_for       | tagttcctgtggtcccgtc                        | YidC gene                                                                      | F505pBpa YidC                                                   |
| F505YidC_rev       | cacggtgaagatgaccggca                       | YidC gene                                                                      |                                                                 |
| Δ3YidC_for         | aaacagcgtatcagccagg                        | YidC gene                                                                      | 392-401 YidC deletion                                           |
| Δ3YidC_rev         | tgctgaatcttcggctgcaa                       | YidC gene                                                                      |                                                                 |
| Δ4YidC_for         | gcgctgtacaaagctgaga                        | YidC gene                                                                      | 401-409 YidC deletion                                           |
| Δ4YidC_rev         | ttgtcatcgcccagacgc                         | YidC gene                                                                      |                                                                 |
| P388A_for          | gcgaagattcaggcaatgcgtg                     | YidC gene                                                                      | Re-orientation of CH <sub>1</sub> -CH <sub>2</sub> loop of YidC |
| P388A_rev          | ctgcaacatacgcattctcgc                      | YidC gene                                                                      |                                                                 |
| deltaSecG_for      | tctagagggctagcaggag                        | pTrc99a-SecY <sub>His</sub> EG-V15pBpa YidC and pTrc99a SecY <sub>His</sub> EG | SecG deletion                                                   |
| deltaSecG_rev      | aatcaactcctggatcctt                        |                                                                                |                                                                 |

|                       |                                                           |                                                                                       |                                                                                                       |
|-----------------------|-----------------------------------------------------------|---------------------------------------------------------------------------------------|-------------------------------------------------------------------------------------------------------|
|                       |                                                           | -D236pBpa YidC                                                                        |                                                                                                       |
| SecY-L127-for<br>(60) | gtgtaggcaatattccagtcgac                                   | pTrc99a-SecYEG-<br>YidC <sub>His</sub>                                                | pTrc99a-<br>L127pBpa<br>SecYEG-YidC <sub>His</sub>                                                    |
| SecY-L127-rev<br>(60) | cagagtaccgtagcgggtgactg                                   |                                                                                       |                                                                                                       |
| YidC_cutpBadI<br>for  | cgcgatctagagggctagcaggaggaattcac                          | pBad24-YidC <sub>His</sub>                                                            | Amplification of<br>shine dalgarno<br>sequence and<br><i>yidC<sub>His</sub></i>                       |
| YidC_cutpBadI<br>rev  | cggctcgcgactcaggatTTTTctctcgcg                            |                                                                                       |                                                                                                       |
| SecY HisR for         | tactagggccgataaatcgatggaggtttaattcatg                     | pTrc99a-SecYEG-<br>YidC <sub>His</sub> and<br>pTrc99a-<br>SecY <sub>His</sub> EG-YidC | removing His-<br>Tag from<br>SecY <sub>His</sub> EG and<br>restoring of wild<br>type SecY<br>sequence |
| SecY HisR rev         | gccttcagggtcgccttcttcaatgc                                |                                                                                       |                                                                                                       |
| YidC HisR for         | ggcagcggagattcgc                                          | pTrc99a-<br>SecY <sub>His</sub> EG-YidC <sub>His</sub>                                | removing His-<br>Tag from YidC <sub>His</sub>                                                         |
| YidC HisR rev         | catcgttagtgttctccatggtg                                   |                                                                                       |                                                                                                       |
| V519pBa-for           | agcaacctggttaaccatta                                      | pTrc99a-<br>SecY <sub>His</sub> EG-YidC                                               | V519pBpa YidC                                                                                         |
| V519pBpa-rev          | ctagatatagtacagcaccag                                     |                                                                                       |                                                                                                       |
| L513 YidC_for         | taggtgctgactatatac                                        | pTrc99a-<br>SecY <sub>His</sub> EG-YidC                                               | V519pBpa YidC                                                                                         |
| L513 YidC_rev         | acctgacgggaaccacagg                                       |                                                                                       |                                                                                                       |
| YidC K249-<br>forw    | taggggtggtgggtggcgatgctgc                                 | pTrc99a-<br>SecY <sub>His</sub> EG-YidC                                               | K249pBpa YidC                                                                                         |
| YidC K249-rev         | cgaagagatgttcaggtttcgttatcg                               |                                                                                       |                                                                                                       |
| PelB-YidC-for         | tgctgctcctcgtgccagccggcgcgatggccgggaa<br>actgatctcgggtaag | pTrc99a-SecYEG-<br>YidC <sub>His</sub>                                                | Replacement of<br>the 1-56 amino<br>acid region of<br>YidC with pelB<br>signal sequence               |
| PelB-YidC-rev         | gaccagcagcagcggtcggcagcaggtatttcgttagt<br>gttctccatggtga  |                                                                                       |                                                                                                       |
| Rest.pelB-for         | aaatacctgctgccgaccgaccg                                   | pTrc99a-SecYEG-<br>(pelB-YidC)                                                        | Addition of ATG<br>in front of the<br>pelB signal<br>sequence                                         |
| Rest.pelB-rev         | catcgttagtgttctccatggtg                                   |                                                                                       |                                                                                                       |

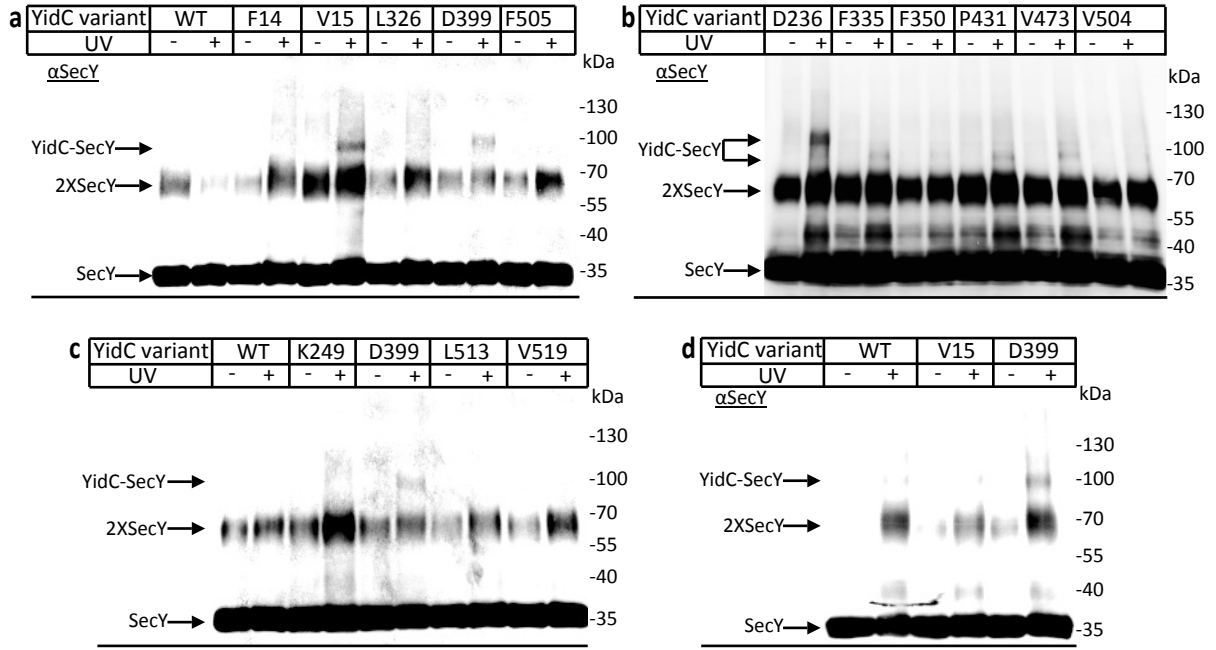

(Petriman et al., Fig. S1)

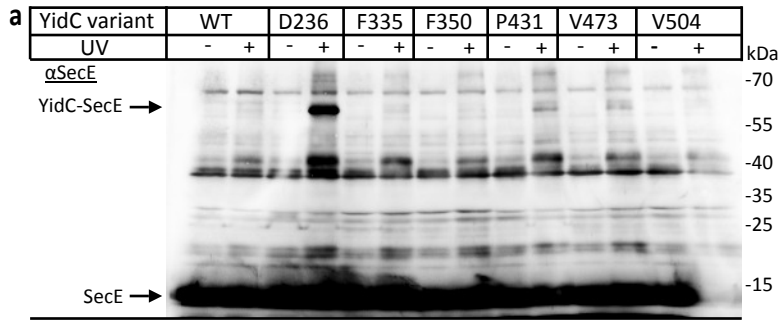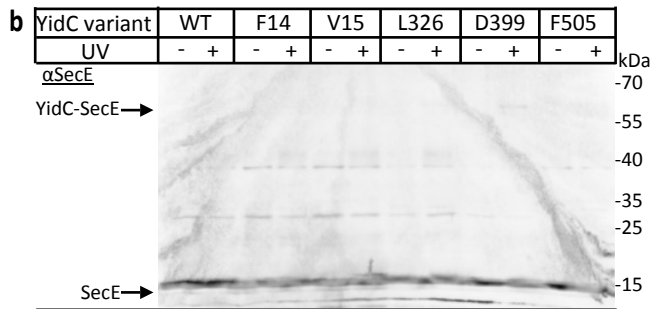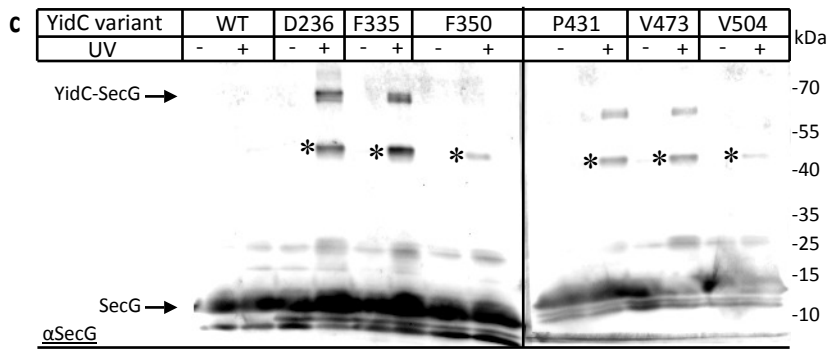

(Petriman et al., Fig. S2)

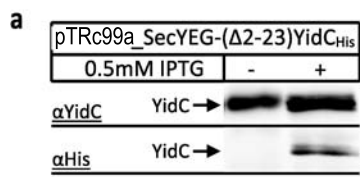

(Petriman et al., Fig. S3)

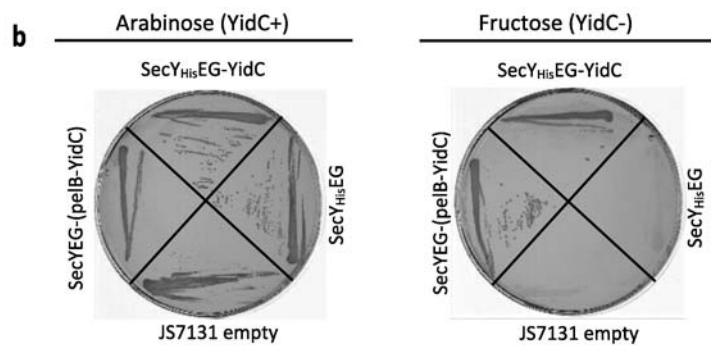



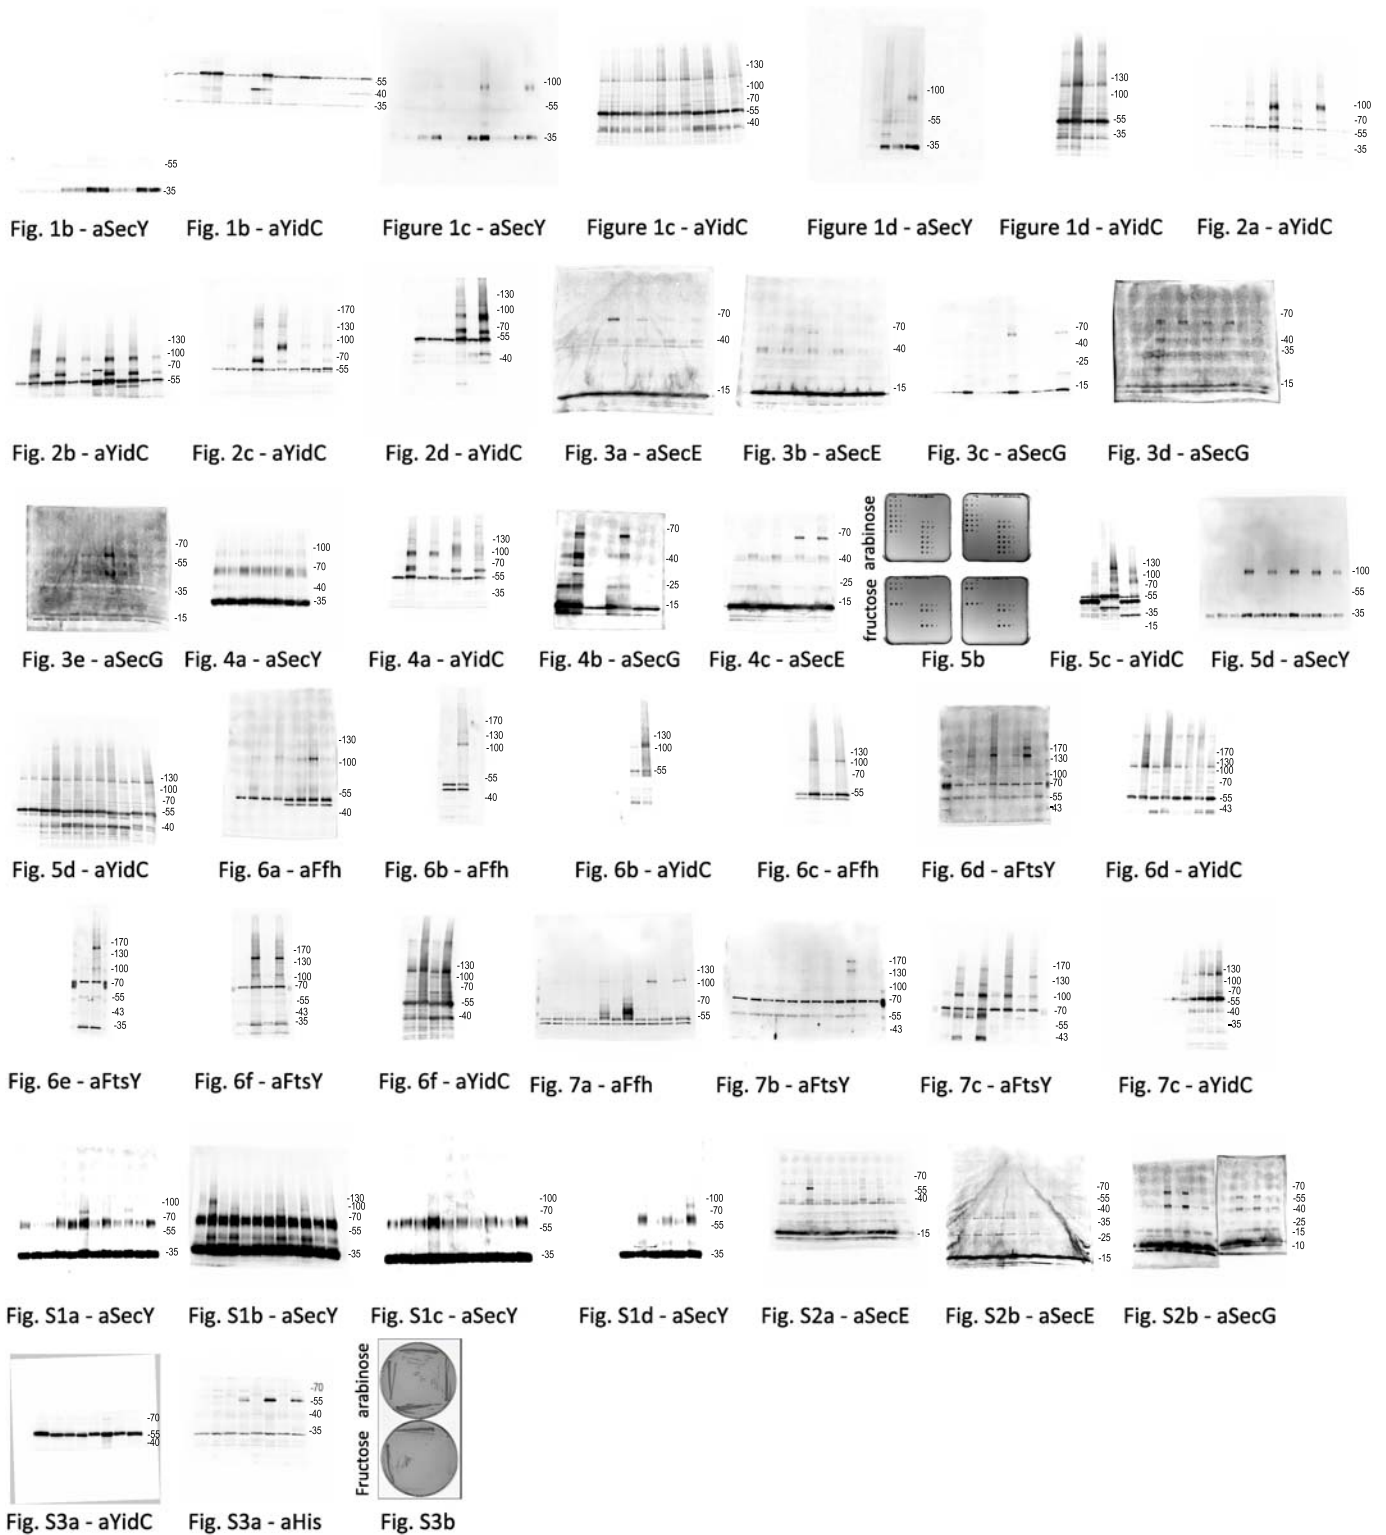

Supplement: 41598_2017_19019_MOESM1_ESM.pdf [file 41598_2017_19019_MOESM1_ESM.pdf]
